# Supplementary material
Source: Springer Nature journal article supplement (https://www.springermedizin.de/resource/supplementary/13256_2010_1887_MOESM7_ESM.pdf/9648342)

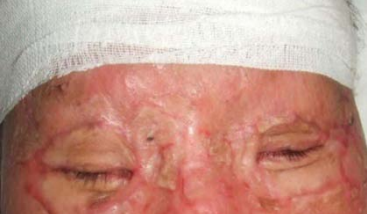

Supplement: MOESM7 [file 9648342]
